# Supplementary material for: Family Visiting Restrictions and Postoperative Clinical Outcomes: A Retrospective Analysis
Source: MDPI journal article supplement (doi:10.3390/nursrep12030057), 2022-08-12
Supplement: s1 [file s1]

Table S1. STROBE Statement—Checklist of items that should be included in reports of *cohort studies*.

|                           | Item n. | Recommendation                                                                                                                                                                       | Descriptions                                                                                                                                                                                                                       |
|---------------------------|---------|--------------------------------------------------------------------------------------------------------------------------------------------------------------------------------------|------------------------------------------------------------------------------------------------------------------------------------------------------------------------------------------------------------------------------------|
| <b>Title and abstract</b> | 1       | (a) Indicate the study's design with a commonly used term in the title or the abstract                                                                                               | Reported in the title                                                                                                                                                                                                              |
|                           |         | (b) Provide in the abstract an informative and balanced summary of what was done and what was found                                                                                  | Abstract reported                                                                                                                                                                                                                  |
| <b>Introduction</b>       |         |                                                                                                                                                                                      |                                                                                                                                                                                                                                    |
| Background/rationale      | 2       | Explain the scientific background and rationale for the investigation being reported                                                                                                 | Summarised in the Introduction                                                                                                                                                                                                     |
| Objectives                | 3       | State specific objectives, including any prespecified hypotheses                                                                                                                     | Reported in the end of the Introduction                                                                                                                                                                                            |
| <b>Methods</b>            |         |                                                                                                                                                                                      |                                                                                                                                                                                                                                    |
| Study design              | 4       | Present key elements of study design early in the paper                                                                                                                              | The key elements are reported under the Materials and Methods                                                                                                                                                                      |
| Setting                   | 5       | Describe the setting, locations, and relevant dates, including periods of recruitment, exposure, follow-up, and data collection                                                      | Settings (Academic hospital, Post-operative unit), recruitment periods, relevant dates, and data collection, have been all reported in the Materials and Methods                                                                   |
| Participants              | 6       | (a) Give the eligibility criteria, and the sources and methods of selection of participants. Describe methods of follow-up                                                           | Eligibility criteria have been reported in the methods (all postoperative patients (>18 years) cared for in the surgical unit of at least 72 hours after the surgical procedures)                                                  |
|                           |         | (b) For matched studies, give matching criteria and number of exposed and unexposed                                                                                                  | Matching criteria have been reported under the methods (age ( $\pm$ 9 years), gender and surgical procedure group)                                                                                                                 |
| Variables                 | 7       | Clearly define all outcomes, exposures, predictors, potential confounders, and effect modifiers. Give diagnostic criteria, if applicable                                             | Outcome measures were detailed in the methods (disorientation/agitation, anxiety, depression episodes; sleepless nights; pain episodes, clinical deterioration; PRs use, device-removed incidents; PRN medications and in the LOS) |
| Data sources/measurement  | 8*      | For each variable of interest, give sources of data and details of methods of assessment (measurement). Describe comparability of assessment methods if there is more than one group | Outcomes measures, demographic and some clinical data were extracted from the medical records of identified patients                                                                                                               |
| Bias                      | 9       | Describe any efforts to address potential sources of bias                                                                                                                            | These efforts have been described in the risk-of-bias assessment paragraph                                                                                                                                                         |
| Study size                | 10      | Explain how the study size was arrived at                                                                                                                                            | A sample size calculation was not                                                                                                                                                                                                  |

|                        |     |                                                                                                                                                                                                   |                                                                                                                                                                                                           |
|------------------------|-----|---------------------------------------------------------------------------------------------------------------------------------------------------------------------------------------------------|-----------------------------------------------------------------------------------------------------------------------------------------------------------------------------------------------------------|
|                        |     |                                                                                                                                                                                                   | performed                                                                                                                                                                                                 |
| Quantitative variables | 11  | Explain how quantitative variables were handled in the analyses. If applicable, describe which groupings were chosen and why                                                                      | Reported in the methods                                                                                                                                                                                   |
| Statistical methods    | 12  | (a) Describe all statistical methods, including those used to control for confounding                                                                                                             | Reported in the methods (data were analysed with the SPSS version 27, IBM Corp., Armonk, NY, USA by calculating means, standard deviations [SD], frequencies and percentages)                             |
|                        |     | (b) Describe any methods used to examine subgroups and interactions                                                                                                                               | Not performed                                                                                                                                                                                             |
|                        |     | (c) Explain how missing data were addressed                                                                                                                                                       | No missing data have been detected in the medical records among that considered in this study: data were collected on a routine basis according to the minimum data set established at the hospital level |
|                        |     | (d) If applicable, explain how loss to follow-up was addressed                                                                                                                                    | Not applicable                                                                                                                                                                                            |
|                        |     | (e) Describe any sensitivity analyses                                                                                                                                                             | Not applicable                                                                                                                                                                                            |
| Results                |     |                                                                                                                                                                                                   |                                                                                                                                                                                                           |
| Participants           | 13* | (a) Report numbers of individuals at each stage of study—eg numbers potentially eligible, examined for eligibility, confirmed eligible, included in the study, completing follow-up, and analysed | Summarised in the results. All consecutive eligible exposed and unexposed were considered and, when satisfying the inclusion criteria, included                                                           |
|                        |     | (b) Give reasons for non-participation at each stage                                                                                                                                              | Not required given that all consecutive eligible exposed and unexposed were assessed for eligibility and then included                                                                                    |
|                        |     | (c) Consider use of a flow diagram                                                                                                                                                                | Not required given that all consecutive eligible exposed and unexposed were assessed for eligibility and then included                                                                                    |
| Descriptive data       | 14* | (a) Give characteristics of study participants (eg demographic, clinical, social) and information on exposures and potential confounders                                                          | Characteristics of participants are summarised in the results and in the Table 1                                                                                                                          |
|                        |     | (b) Indicate number of participants with missing data for each variable of interest                                                                                                               | No missing data have been detected in the medical records among that considered in this study: data were collected on a routine basis as a minimum data set established at the hospital level             |
|                        |     | (c) Summarise follow-up time (eg, average and total amount)                                                                                                                                       | Not applicable                                                                                                                                                                                            |
| Outcome data           | 15* | Report numbers of outcome events or                                                                                                                                                               | Reported in the results                                                                                                                                                                                   |

| summary measures over time |    |                                                                                                                                                                                                              |                                                                                                                                                                                                                |
|----------------------------|----|--------------------------------------------------------------------------------------------------------------------------------------------------------------------------------------------------------------|----------------------------------------------------------------------------------------------------------------------------------------------------------------------------------------------------------------|
| Main results               | 16 | (a) Give unadjusted estimates and, if applicable, confounder-adjusted estimates and their precision (eg, 95% confidence interval). Make clear which confounders were adjusted for and why they were included | A basic statistical analysis has been performed by using descriptive statistics (mean, SD, frequencies and percentages); then, differences between the groups were compared with t-tests and chi-squared tests |
|                            |    | (b) Report category boundaries when continuous variables were categorized                                                                                                                                    | Not performed                                                                                                                                                                                                  |
|                            |    | (c) If relevant, consider translating estimates of relative risk into absolute risk for a meaningful time period                                                                                             | Not performed                                                                                                                                                                                                  |
| Other analyses             | 17 | Report other analyses done—eg analyses of subgroups and interactions, and sensitivity analyses                                                                                                               | Not performed                                                                                                                                                                                                  |
| <b>Discussion</b>          |    |                                                                                                                                                                                                              |                                                                                                                                                                                                                |
| Key results                | 18 | Summarise key results with reference to study objectives                                                                                                                                                     | Reported in the discussion                                                                                                                                                                                     |
| Limitations                | 19 | Discuss limitations of the study, taking into account sources of potential bias or imprecision. Discuss both direction and magnitude of any potential bias                                                   | Reported in the discussion (limits)                                                                                                                                                                            |
| Interpretation             | 20 | Give a cautious overall interpretation of results considering objectives, limitations, multiplicity of analyses, results from similar studies, and other relevant evidence                                   | Reported in the discussion                                                                                                                                                                                     |
| Generalisability           | 21 | Discuss the generalisability (external validity) of the study results                                                                                                                                        | Reported in the discussion (limits)                                                                                                                                                                            |
| <b>Other information</b>   |    |                                                                                                                                                                                                              |                                                                                                                                                                                                                |
| Funding                    | 22 | Give the source of funding and the role of the funders for the present study and, if applicable, for the original study on which the present article is based                                                | Not applicable                                                                                                                                                                                                 |

PR, Physical Restraint; PRN, Pro Re Nata; LOS, Length of Stay; SD, Standard Deviation.

\*Give information separately for exposed and unexposed groups.

**Note:** An Explanation and Elaboration article discusses each checklist item and gives methodological background and published examples of transparent reporting. The STROBE checklist is best used in conjunction with this article (freely available on the Web sites of PLoS Medicine at <http://www.plosmedicine.org/>, Annals of Internal Medicine at <http://www.annals.org/>, and Epidemiology at <http://www.epidem.com/>). Information on the STROBE Initiative is available at <http://www.strobe-statement.org>.
